# Supplementary material for: Genetic Diversity and Spatiotemporal Distribution of SARS-CoV-2 Alpha Variant in India
Source: MDPI journal article supplement (doi:10.3390/covid3040035), 2023-03-31
Supplement: s1 [file s1]

**Supplementary Figure S1.** The Maximum Likelihood (ML) tree showing the diverse placement of three major geographic regions of Alpha variant in India.

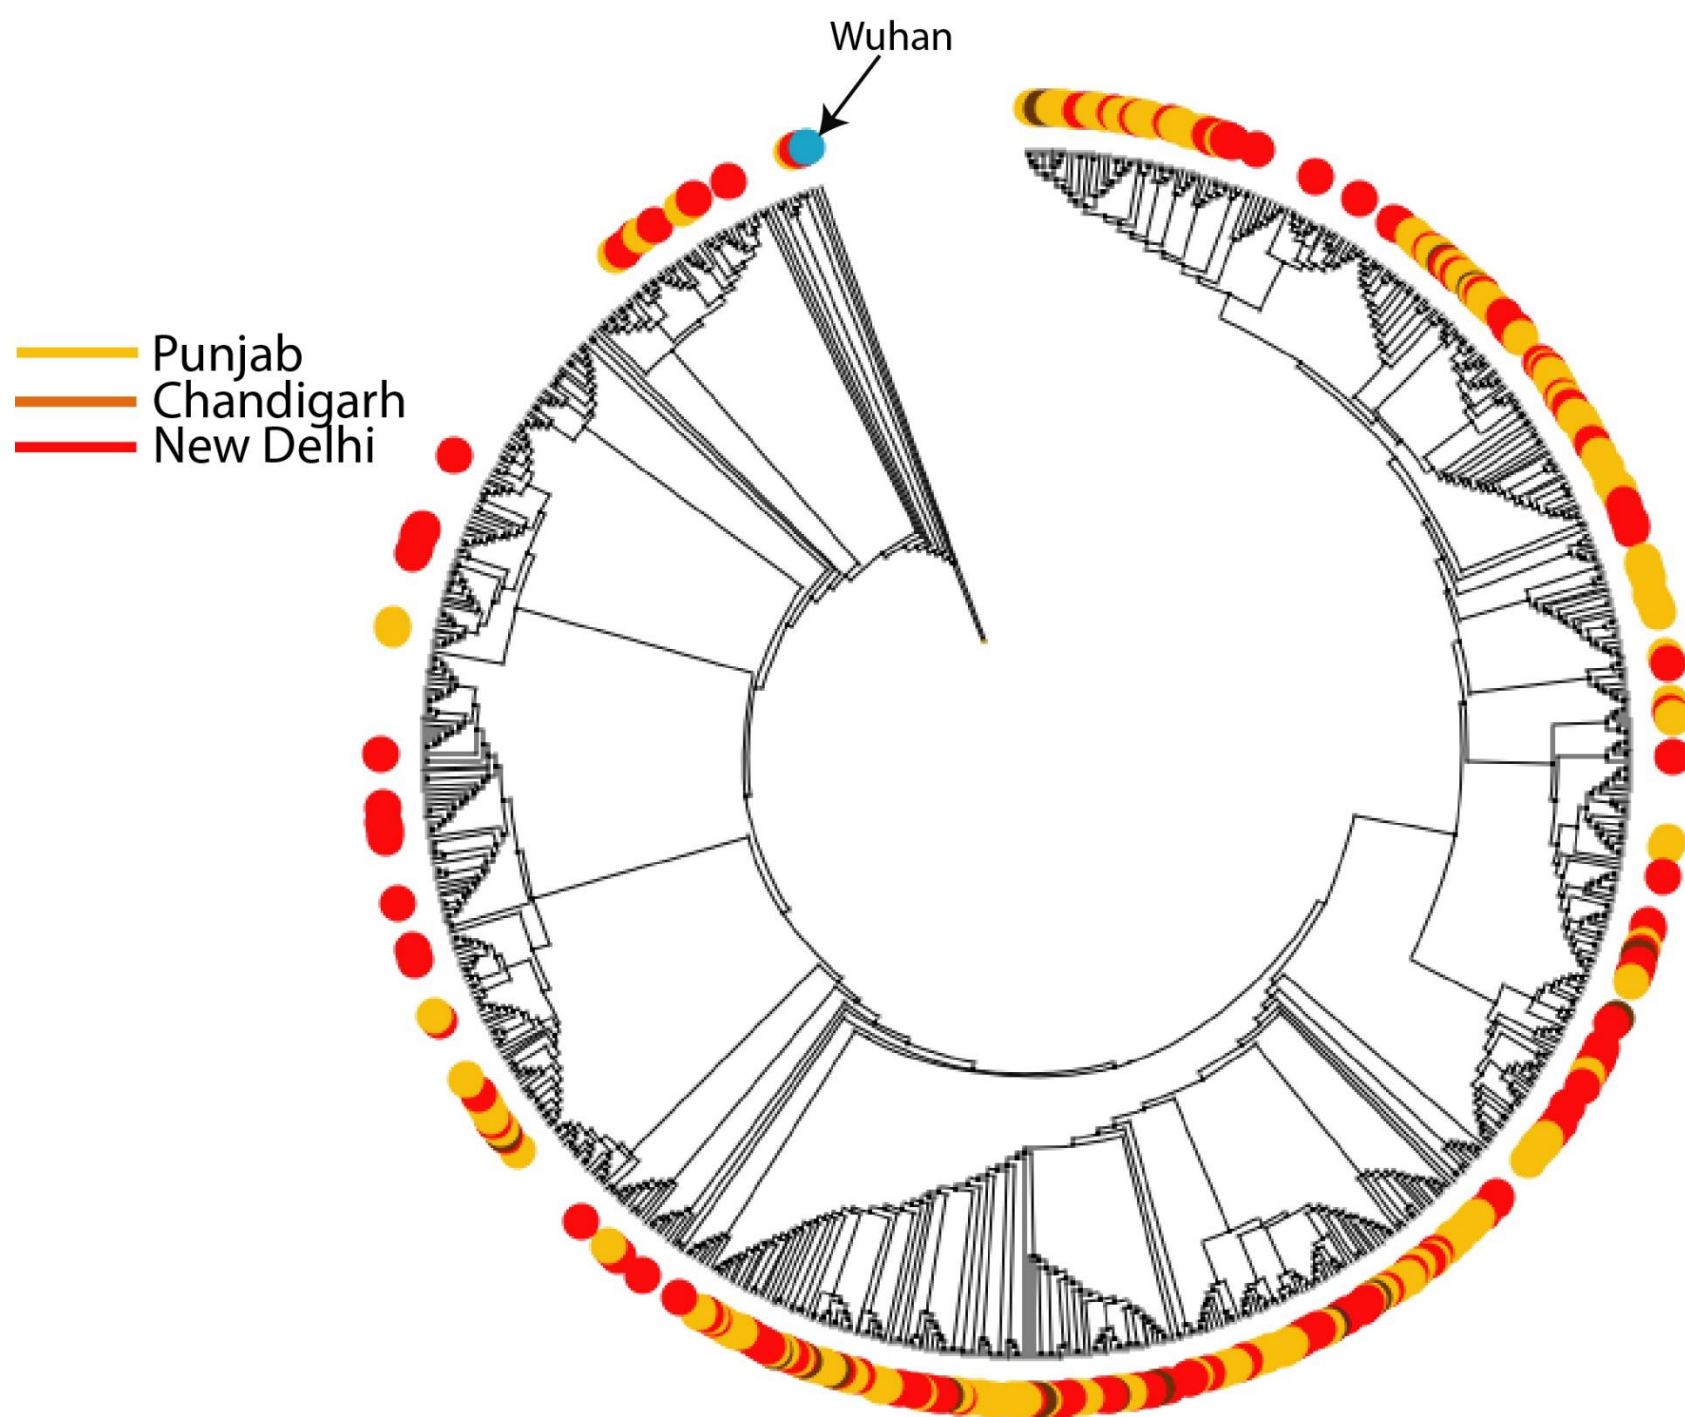

**Supplementary Figure S2:** The temporal expansion of Alpha variant in India showing the extraordinary surge in Punjab state.

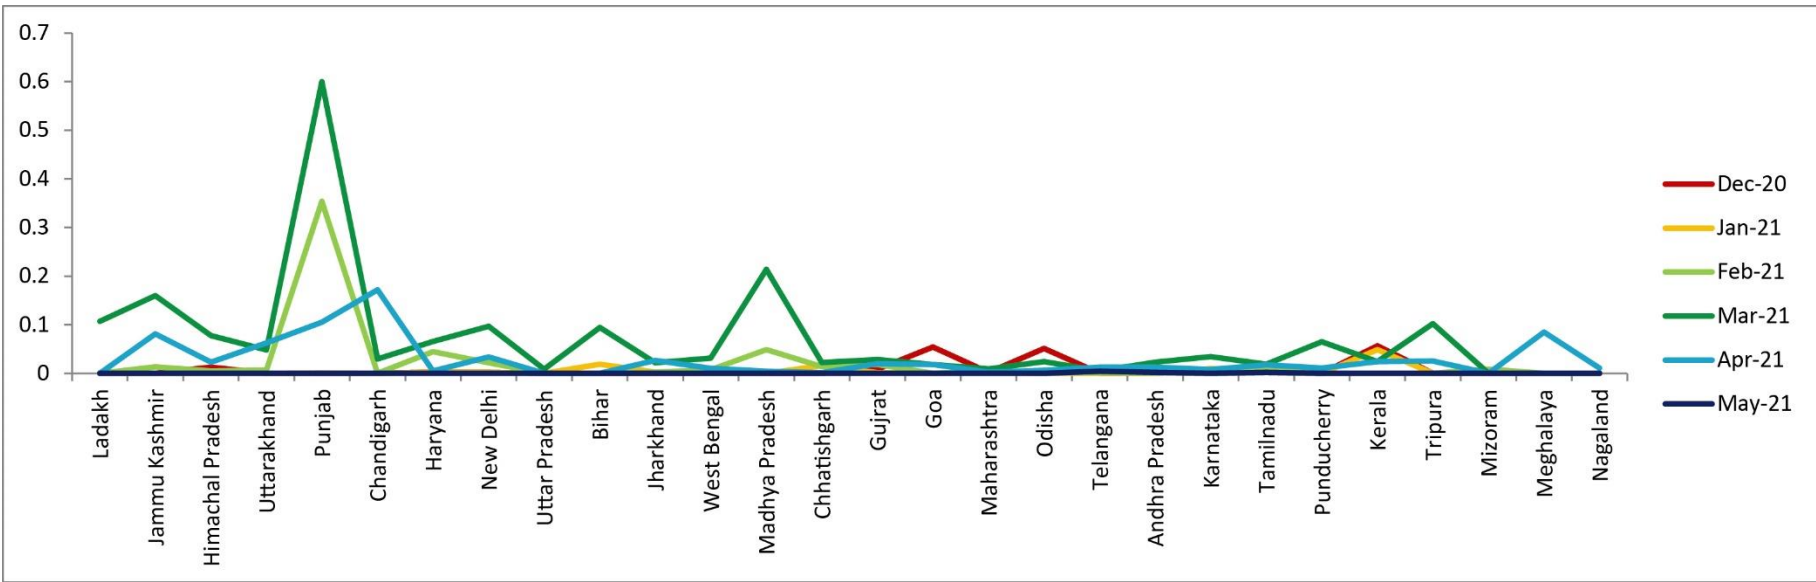

**Supplementary Table S1:** The details of samples studied and the frequency of alpha variant in various regions of India.

| States & Union Territories | Total Number of Samples | Total Number of Samples from B.1.1.7 | Frequency |
|----------------------------|-------------------------|--------------------------------------|-----------|
| Chhatishgarh               | 572                     | 23                                   | 0.0402    |
| Madhya Pradesh             | 5965                    | 120                                  | 0.0201    |
| Bihar                      | 53                      | 6                                    | 0.1132    |
| Jharkhand                  | 415                     | 22                                   | 0.0530    |
| Odisha                     | 81                      | 15                                   | 0.1852    |
| West Bengal                | 2939                    | 171                                  | 0.0582    |
| Chandigarh                 | 197                     | 92                                   | 0.4670    |
| New Delhi                  | 4160                    | 681                                  | 0.1637    |
| Haryana                    | 381                     | 46                                   | 0.1207    |
| Himachal Pradesh           | 389                     | 48                                   | 0.1234    |
| Jammu Kashmir              | 741                     | 189                                  | 0.2551    |
| Ladakh                     | 56                      | 6                                    | 0.1071    |
| Punjab                     | 932                     | 692                                  | 0.7425    |
| Uttar Pradesh              | 221                     | 2                                    | 0.0090    |
| Uttarakhand                | 559                     | 66                                   | 0.1181    |
| Mizoram                    | 199                     | 35                                   | 0.1759    |
| Meghalaya                  | 290                     | 15                                   | 0.0517    |
| Nagaland                   | 71                      | 8                                    | 0.1127    |
| Tripura                    | 39                      | 5                                    | 0.1282    |
| Andhra Pradesh             | 1320                    | 56                                   | 0.0424    |
| Karnataka                  | 1472                    | 131                                  | 0.0890    |
| Kerala                     | 123                     | 26                                   | 0.2114    |
| Tamilnadu                  | 780                     | 29                                   | 0.0372    |
| Punducherry                | 957                     | 70                                   | 0.0731    |
| Telangana                  | 2729                    | 74                                   | 0.0271    |
| Goa                        | 55                      | 5                                    | 0.0909    |
| Gujrat                     | 2375                    | 194                                  | 0.0817    |
| Maharashtra                | 801                     | 237                                  | 0.2959    |
